# Supplementary material
Source: PubMed Central journal article supplement (PMC5897772)
Supplement: EMBJ-37-e97349-s001.pdf [file EMBJ-37-e97349-s001.pdf]

## **Appendix for**

### **Membrane cholesterol depletion as a trigger of Nav1.9-mediated inflammatory pain**

Muriel Amsalem<sup>1</sup>, Corinne Poilbout<sup>1,2</sup>, Géraldine Ferracci<sup>1</sup>, Patrick Delmas<sup>1\*</sup>, Françoise

<sup>1</sup>Aix-Marseille-Université; CNRS; CRN2M UMR 7286, CS80011, Bd Pierre Dramard, 13344  
Marseille Cedex 15 France.

<sup>2</sup>Present address: Centre de psychiatrie et de neurosciences, 2 ter rue d'Alésia 75014 Paris.

Table of contents

Appendix Figure S1 Immunostaining of Nav1.9 proteins along DRG neuron fibers in skin territory.....p3

Appendix Figure S2 Cholesterol oxidation-induced mechanical hypersensitivity is unchanged in Nav1.8 KO mice.....p4

Appendix Figure S3 Time course of Nav1.9 potentiation by M $\beta$ CD.....p5

Appendix Figure S4 M $\beta$ CD modulates Nav1.9 partitioning in DRM-raft like microdomains....p6

Appendix Figure S5 Identification of cholesterol consensus binding domains on Nav1.9 sequence.....p8

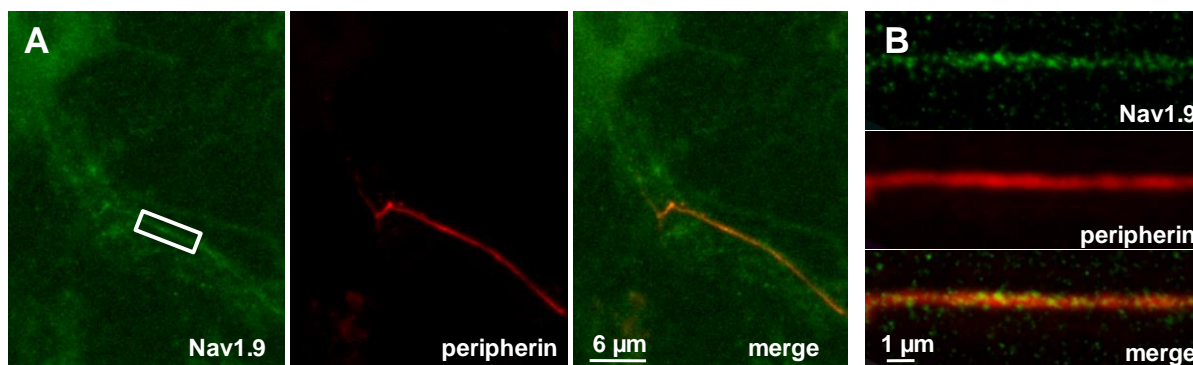

**Appendix Figure S1.**

**Immunostaining of Nav1.9 proteins along DRG neuron fibers in skin territory.**

(A) Confocal images of double staining of nerve terminals in frozen sections of mouse skin paw.

(B) Magnification of the zone highlighted in A after deconvolution treatment showing a punctate distribution of Nav1.9 channels along a peripherin-positive nerve fiber.

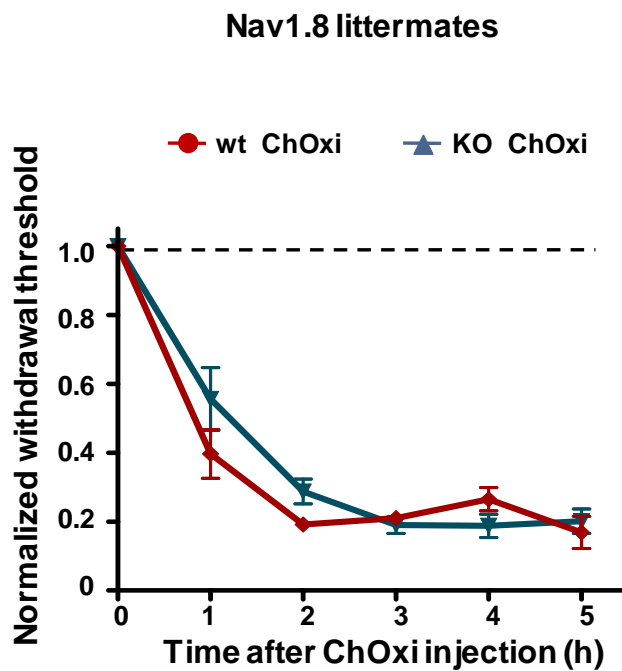

**Appendix Figure S2.**

**Cholesterol oxidation-induced mechanical hypersensitivity is unchanged in Nav1.8 KO mice.**

Mechanical hypersensitivity caused by intraplantar injection of ChOxi (4U/ml) is similar in Nav1.8 KO mice (n = 8) compared to wt littermates (n = 6) (p = 0.39, two way ANOVA test).

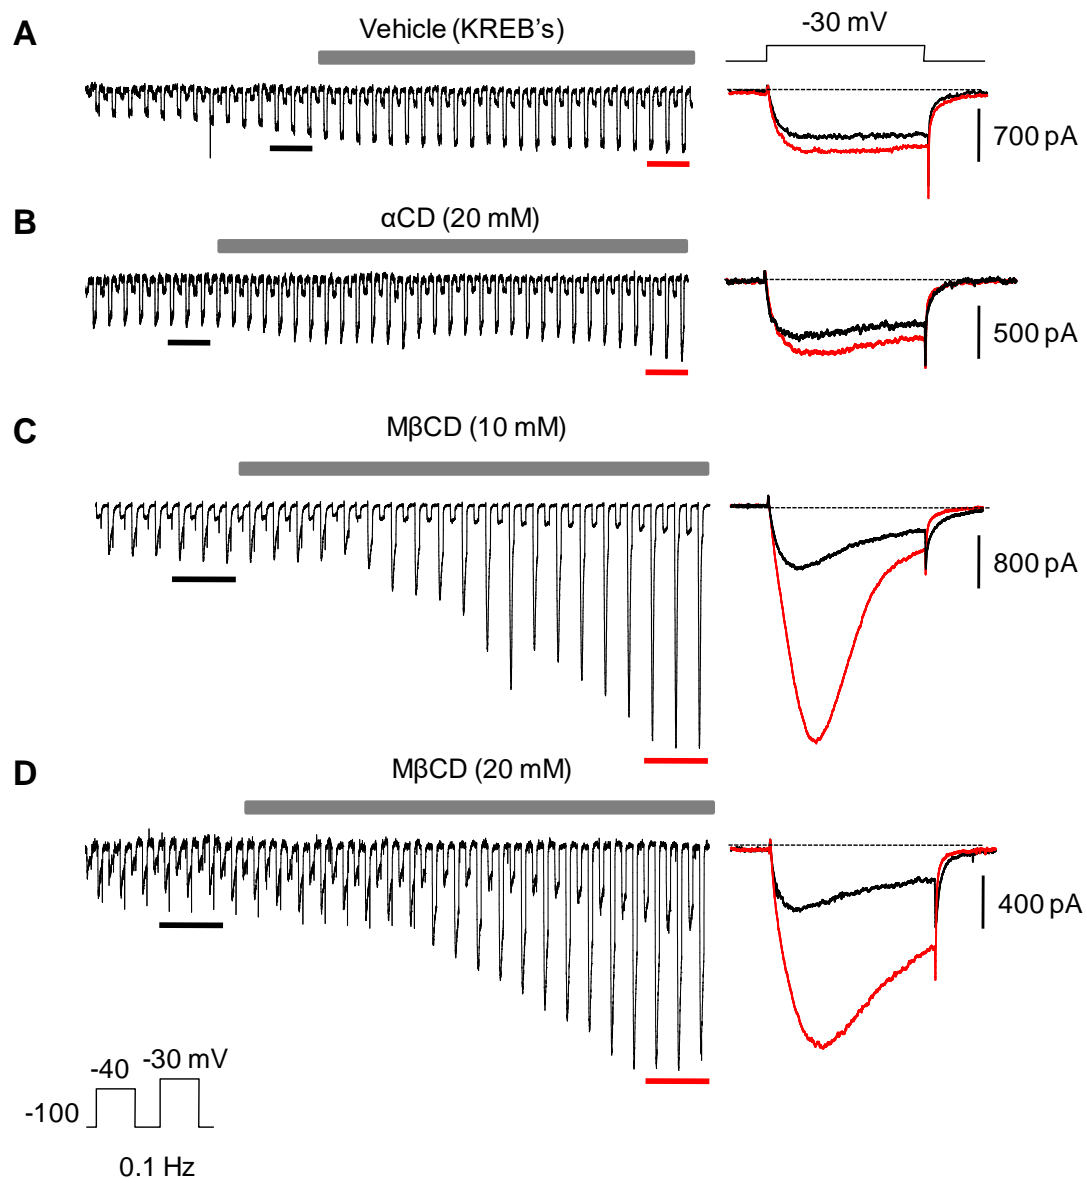

### Appendix Figure S3.

#### Time course of Nav1.9 potentiation by M $\beta$ CD.

Recording of Nav1.9 in DRG neurons superfused with Kreb's (vehicle) (A) or Kreb's supplemented with  $\alpha$ CD (20 mM) (B) or M $\beta$ CD (10 and 20 mM as indicated) (C-D). Nav1.9 currents were evoked by 100 ms-depolarizing double voltage steps to -40 and -30 mV ( $V_h = -100$  mV) every 20 s. Each illustration represents a concatenated sequence of consecutive sweeps. Right inset: superimposed Nav1.9 current traces evoked at -30 mV and collected as indicated by colored lines on concatenated traces (average of 3 consecutive traces).

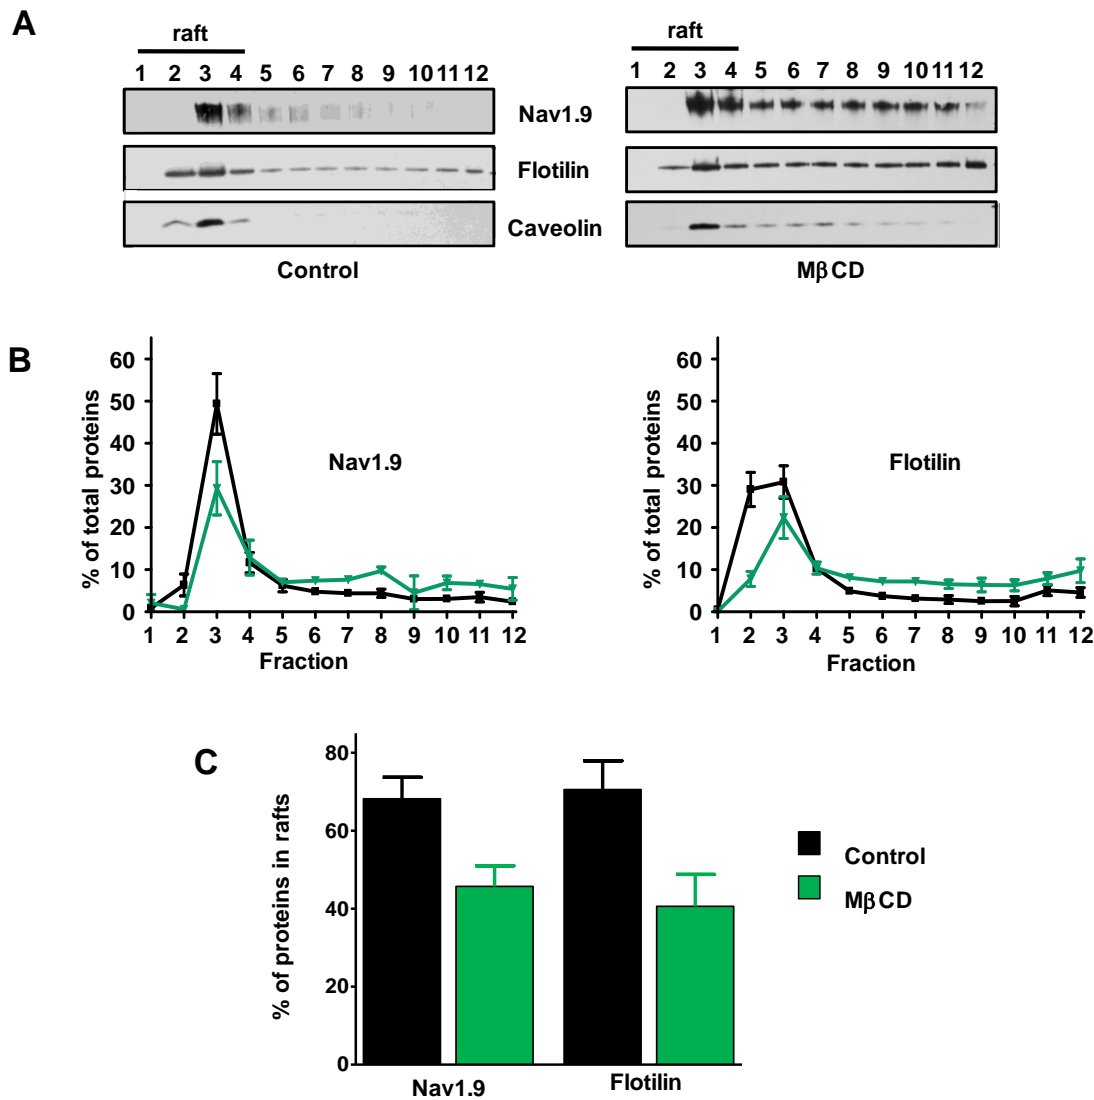

**Appendix Figure S4.**

**MβCD modulates Nav1.9 partitioning in DRM-raft like microdomains.**

(A) Representative Western blot of DRM fractions of freshly isolated cells from DRGs incubated for 15 min at 37°C with DMEM (left panel, same as Figure 5A) or DMEM + MβCD (40 mM) (right panel). Fraction 1 represents the top of the gradient and fraction 12 the bottom. Lipid rafts-DRM fractions are revealed by the presence of flotilin and caveolin. (B) Quantification of Nav1.9 and flotilin signals obtained for each separated fraction of DMEM-treated control (black line; same as Fig 5) or DMEM + MβCD-treated (green line; n = 2) DRGs. Values of each fraction are expressed as a percentage of the sum of signals from all fractions. (C) Quantification of Nav1.9

and flotilin proteins in raft fractions (sum of fractions 1 to 4) of control and M $\beta$ CD-treated DRGs (black and green bars, respectively).

**CRAC, CCM or CARC consensus cholesterol binding domains on Nav1.9 sequence**

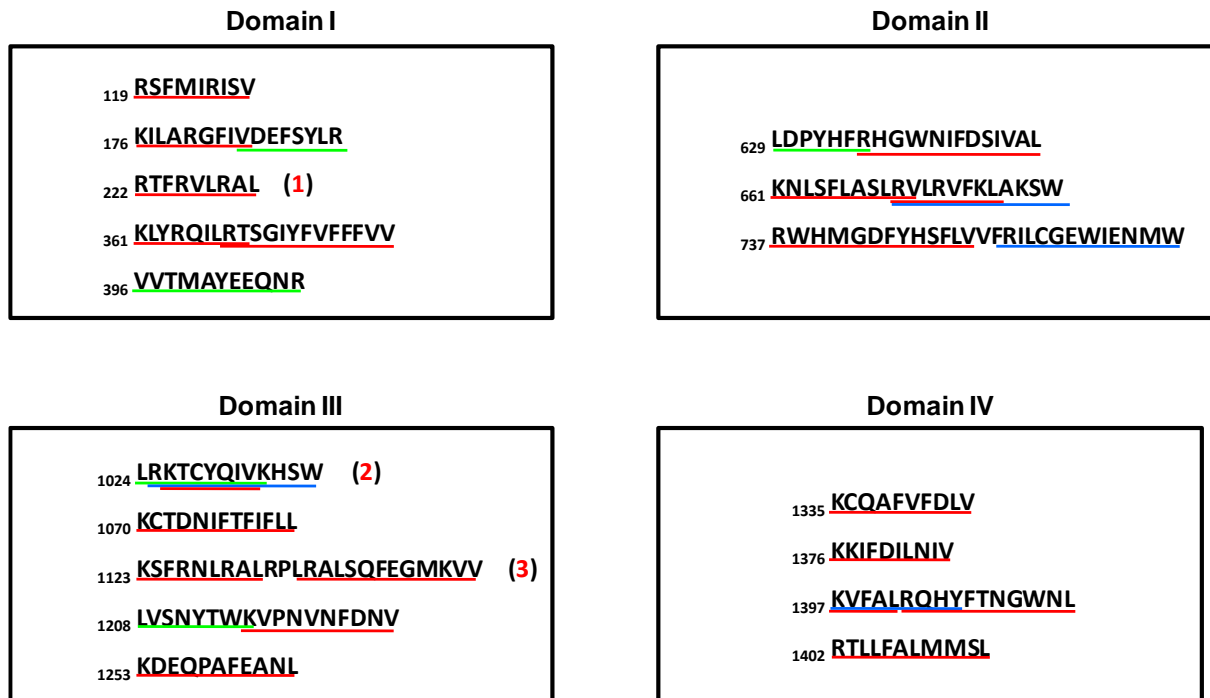

**Appendix Figure S5.**

**Identification of cholesterol consensus binding domains on Nav1.9 sequence.**

Sequences of CRAC, CCM and CARC domains underlined on transmembrane and juxta membrane domains of Nav1.9 protein sequence, distributed in the 4 structural domains of the channel. Peptide 1, 2 and 3 are indicated in bracket.
