# Supplementary material
Source: PubMed Central journal article supplement (PMC5897772)
Supplement: EMBJ-37-e97349-s002.pdf [file EMBJ-37-e97349-s002.pdf]

## Expanded View Figures

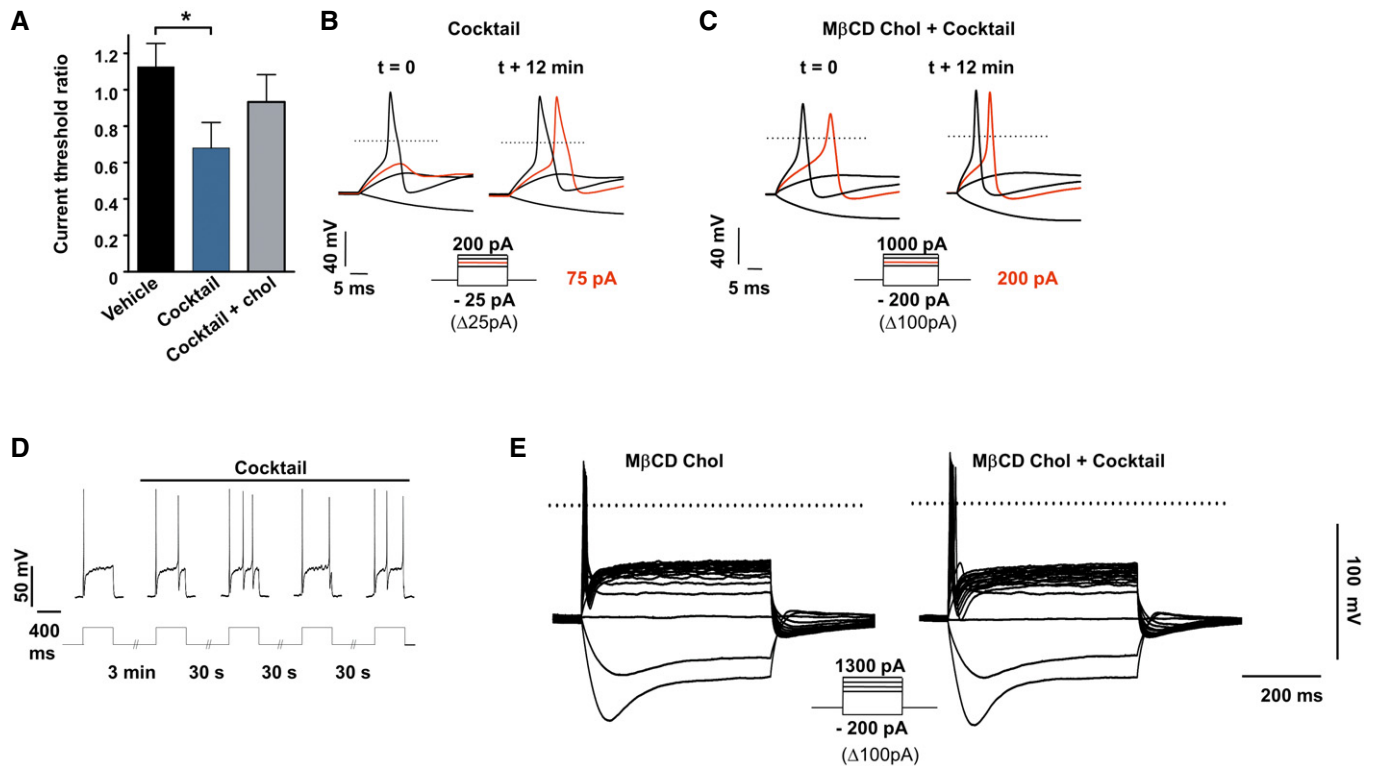

**Figure EV1. Increased excitability induced by the inflammatory cocktail is prevented by soluble cholesterol.**

- A** Ratio of current threshold for AP determined in DRG neurons treated with vehicle ( $n = 5$ ) or with the inflammatory cocktail ( $1\times$ ) pre-treated ( $n = 5$ ) or not ( $n = 7$ ) with MβCD-chol (20 mM) for 10 min. For each cell, the current threshold was measured before ( $t = 0$ ) and 12 min after bath application of the cocktail or its vehicle. Values are shown as mean  $\pm$  standard error of the mean (SEM). Results were analyzed with a Mann-Whitney  $U$ -test.  $*P < 0.05$ .
- B, C** Representative recordings of current threshold for AP before ( $t = 0$ ) and 12 min after bath application of the inflammatory cocktail in DRG neurons pre-treated (C) or not (B) with MβCD-chol. For clarity's sake, not all traces were illustrated. The red traces represent the voltage response induced by the injected current necessary to induce an action potential at  $t = 12$  min. The dashed lines indicate 0 mV.
- D** Enhanced firing of a DRG neuron (27 pF) after bath application of the inflammatory cocktail. Injected current: 100 pA.
- E** Inhibition of inflammatory cocktail-induced hyperexcitability in a DRG neuron pre-treated with MβCD-chol (20 mM).

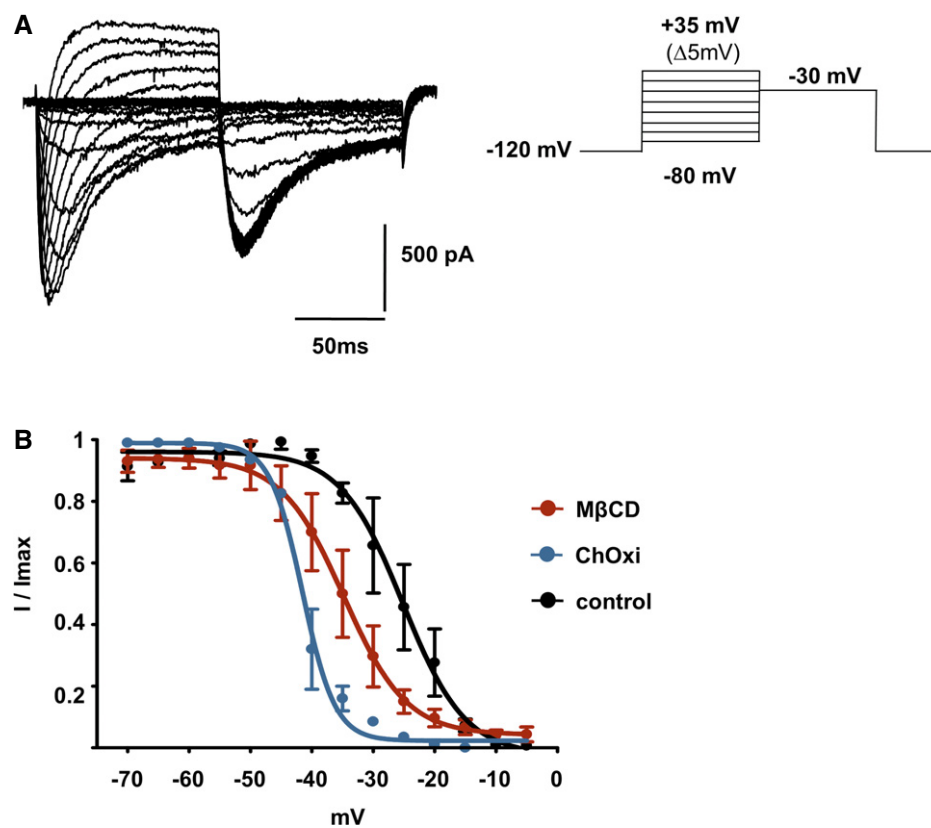

**Figure EV2. Cholesterol depletion negatively shifts the “fast” inactivation voltage dependency of Nav1.9.**

A Families of Nav1.9 current traces recorded after 10-min treatment with 20 mM MβCD. The test pulse to -30 mV was preceded by a family of depolarizing pulses ranging from -80 to 35 mV for 100 ms, while the cell was held at -120 mV.

B Fast inactivation curves of Nav1.9 current in control DRG neurons ( $n = 3$ ) and in neurons treated with 20 mM MβCD ( $n = 3$ ) or 2 U/ml ChOxi ( $n = 2$ ) for 10 min. Curves were fitted by using single Boltzmann equations, yielding  $V_{0.5}$  values of  $-25.17 \pm 1.14$ ,  $-34.8 \pm 1.1$ , and  $-41.54 \pm 0.38$  mV, respectively. Values are shown as mean  $\pm$  standard error of the mean (SEM).

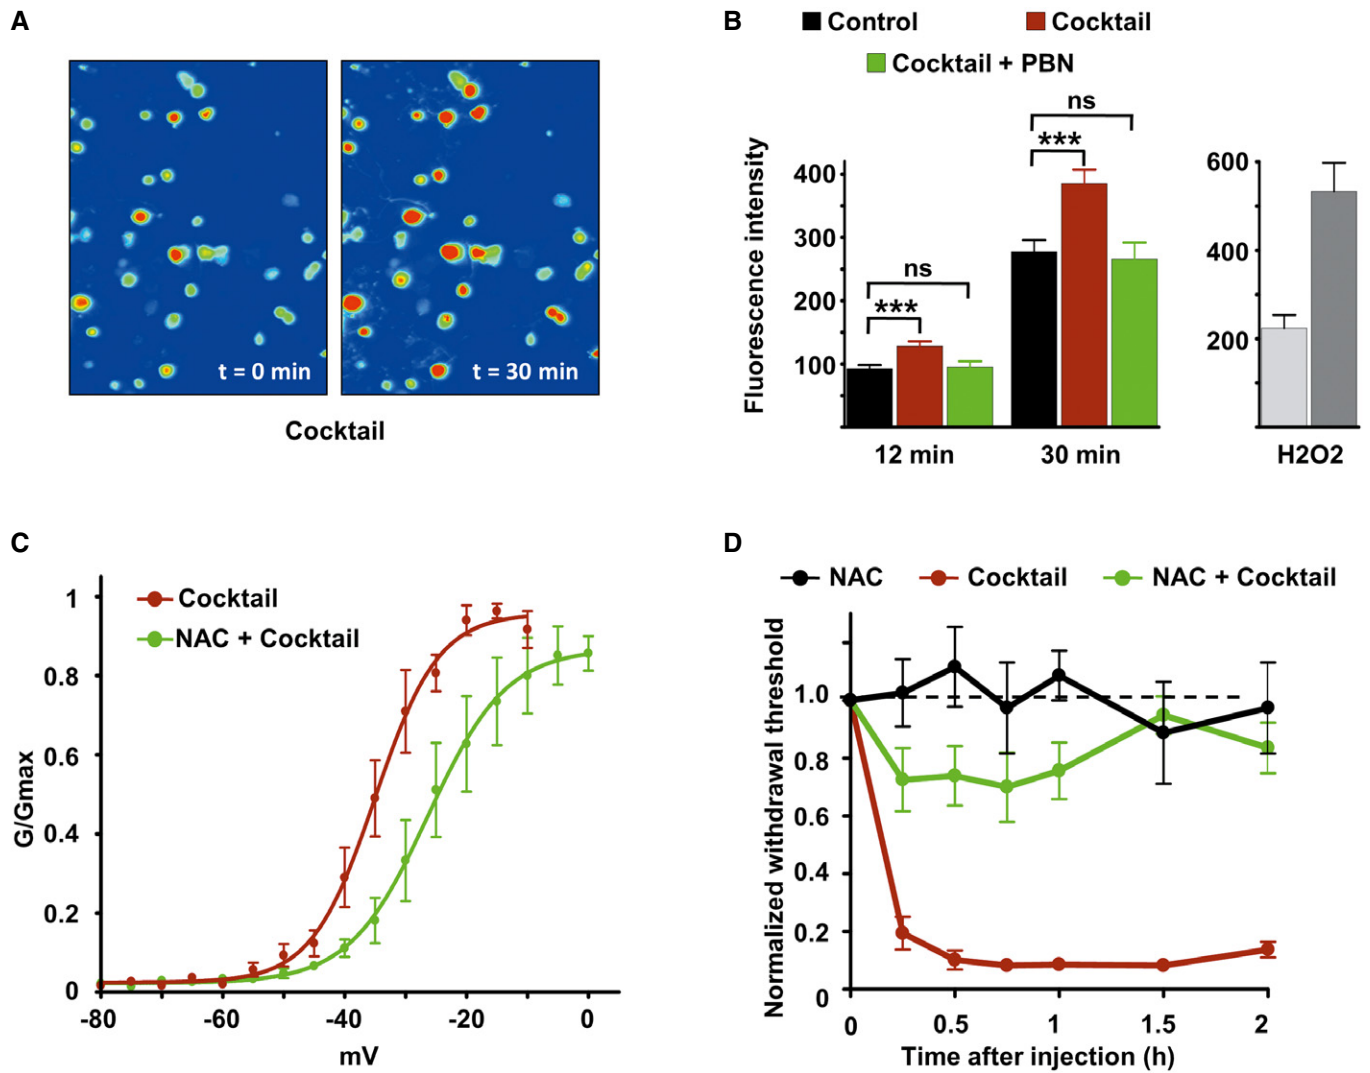

**Figure EV3. The inflammatory cocktail causes pain hypersensitivity through production of increased reactive oxygen species.**

A Imaging of DRG neurons loaded with the ROS-sensitive probe H<sub>2</sub>DCFDA before (t = 0) and 30 min after inflammatory cocktail application.

B Left panel: Fluorescence intensity of cultured DRG neurons loaded with ROS-sensitive probe H<sub>2</sub>DCFDA in control neurons (black bars, n = 114), neurons treated with the inflammatory cocktail (red bars, n = 119), and neurons co-treated with inflammatory cocktail and 4 mM of the ROS scavenger alpha-phenyl-N-tert-butyl nitron (PBN, green bars, n = 95). Measure of fluorescence intensity was made 12 and 30 min after drug application. Right panel: positive control for ROS detection. DRG neurons (n = 15) were treated with 0.3% H<sub>2</sub>O<sub>2</sub> and imaged at 12 (light gray) and 30 min (dark gray) after drug application. Fluorescence intensity (B) was analyzed with a non-parametric Mann-Whitney U-test. \*\*\*P < 0.001.

C Activation curves of Nav1.9 current fitted with single Boltzmann equations giving V<sub>0.5</sub> values of -35.02 ± 0.79 mV (n = 3, black line) and -26.34 ± 1.5 mV (n = 8, green line) for cells treated with the cocktail or with cocktail + NAC, respectively. Current were recorded 10 min after adding drugs.

D Comparison of mechanical hypersensitivity induced by intraplantar injection of NAC (n = 5, 20 mM), cocktail (20×, n = 4), and NAC + cocktail (n = 9). Note that the effects of cocktail were strongly reduced by NAC when injected simultaneously.

Data information: All values are shown as mean ± standard error of the mean (SEM).

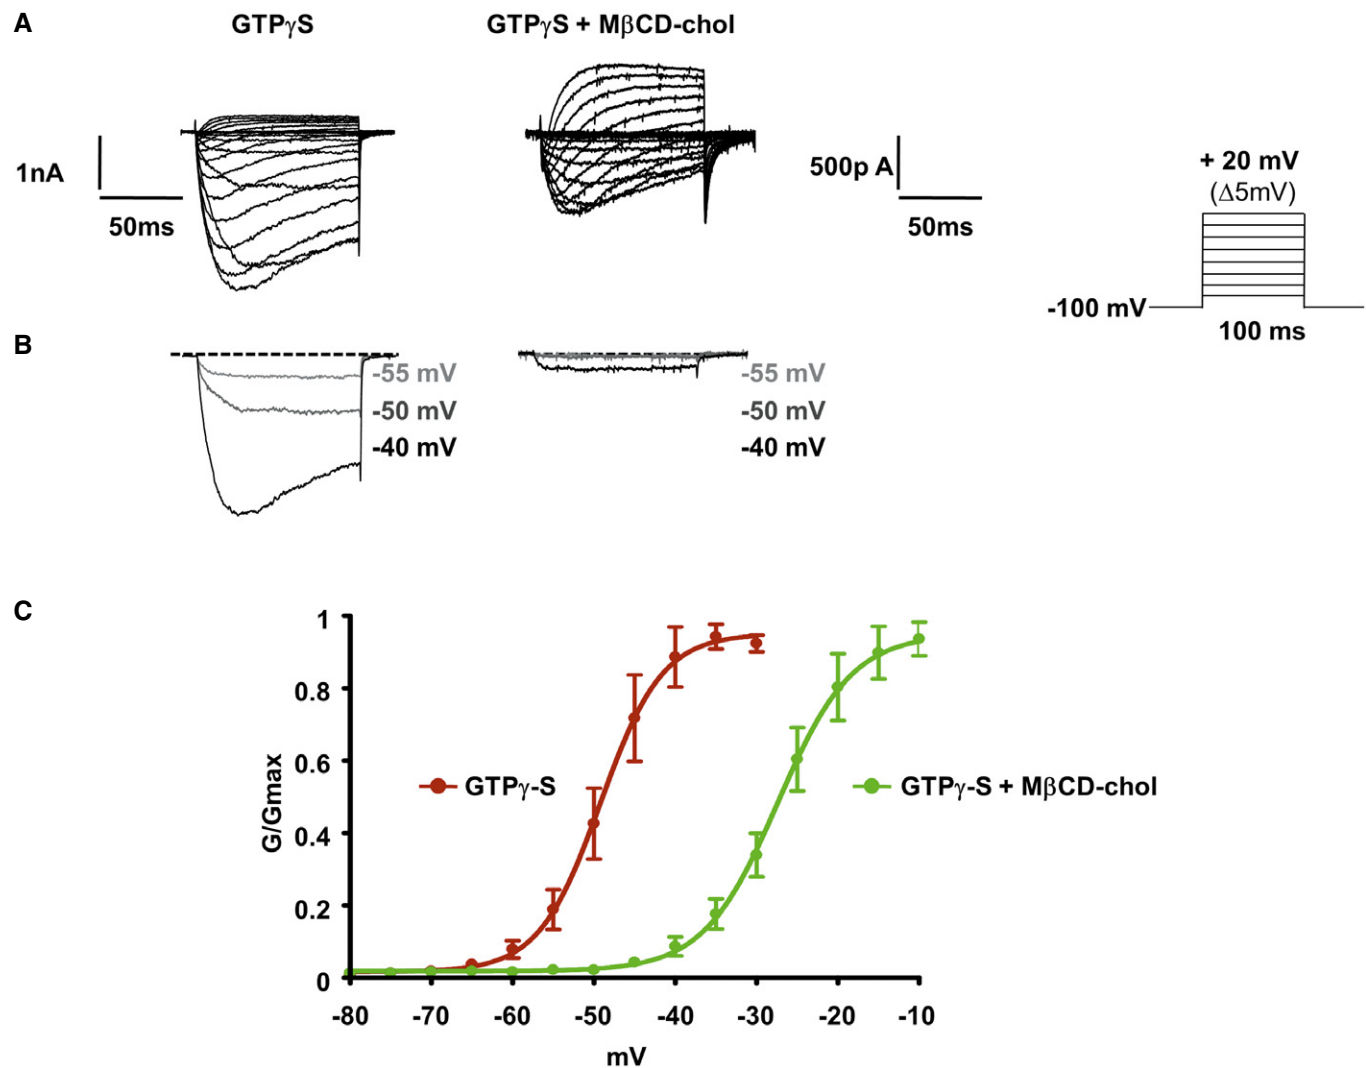

**Figure EV4. Activation of Nav1.9 by  $GTP\gamma S$ , a non-hydrolyzable G protein-activating analog of GTP, is prevented by soluble cholesterol.**

- A Representative current traces evoked by 100-ms depolarizing voltage steps from  $-80$  to  $+20$  mV ( $\Delta 5$  mV,  $V_h = -100$  mV). Nav1.9 currents were recorded 10 min after achieving whole-cell recording configuration with patch pipette solution containing  $400 \mu M$  of  $GTP\gamma S$ . In the right panel, DRG neurons were pre-incubated prior recording with  $M\beta CD\text{-chol}$  ( $20$  mM) for 10 min.
- B Currents evoked at  $-55$ ,  $-50$ , and  $-40$  mV from (A) are illustrated.
- C Corresponding activation curves of Nav1.9 current fitted with a single Boltzmann equation. Values for  $V_{0.5}$  of activation are  $-27.4 \pm 0.7$  mV ( $n = 7$ , green line) and  $-49.2 \pm 0.8$  mV ( $n = 8$ , red line) with and without  $M\beta CD\text{-chol}$ , respectively. Values are shown as mean  $\pm$  standard error of the mean (SEM).

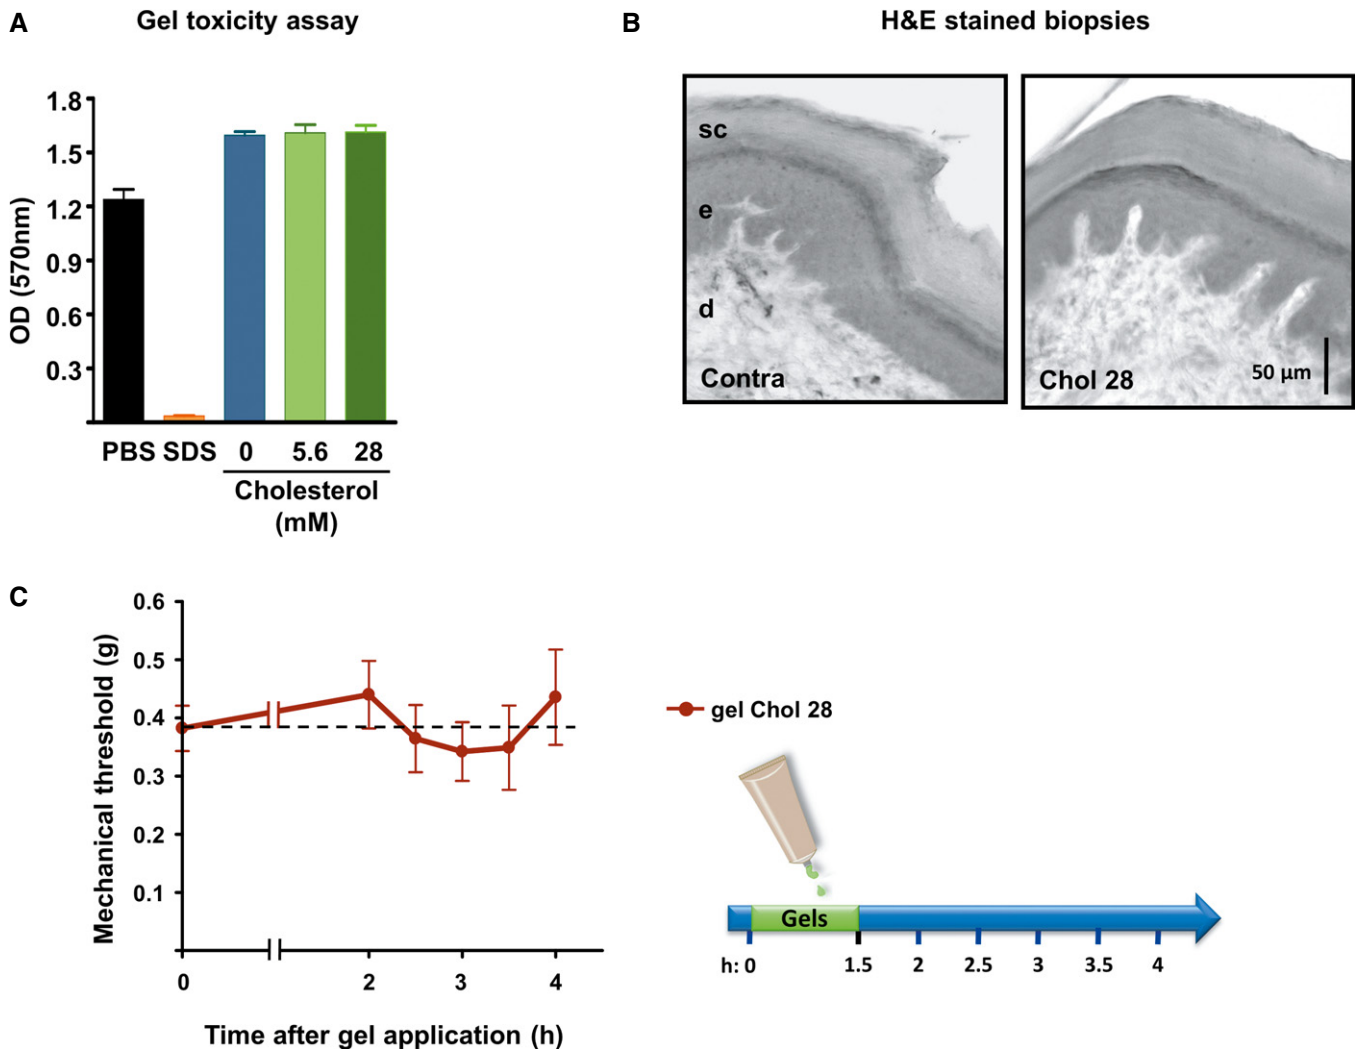

**Figure EV5. Cholesterol gels do not impair cell viability, skin structure, and mechanical threshold.**

A Cell viability of reconstructed human epidermis measured with an MTT assay 48 h after exposure to PBS (non-toxic control,  $n = 3$ ), 5% SDS (toxic control,  $n = 3$ ), HEC gel containing no cholesterol (0 mM,  $n = 3$ ), and HEC gels containing soluble cholesterol at the concentration of 5.6 or 28 mM ( $n = 3$  each).

B Hematoxylin–eosin staining of standardized skin biopsy specimen from paw treated for 1.5 h with an HEC gel containing 28 mM of cholesterol. sc: stratum corneum; e: epidermis; d: dermis.

C Mechanical withdrawal threshold of mice treated for 1.5 h with an HEC gel containing 28 mM of cholesterol ( $n = 9$ ).

Data information: All values are shown as mean  $\pm$  standard error of the mean (SEM).
